# Supplementary figures and images for: A unique alkaline pH-regulated and fatty acid-activated tandem pore domain potassium channel (K2P) from a marine sponge
Source: Oxford University Press journal article supplement (doi:10.1242/jeb.066233), 2012-06-21

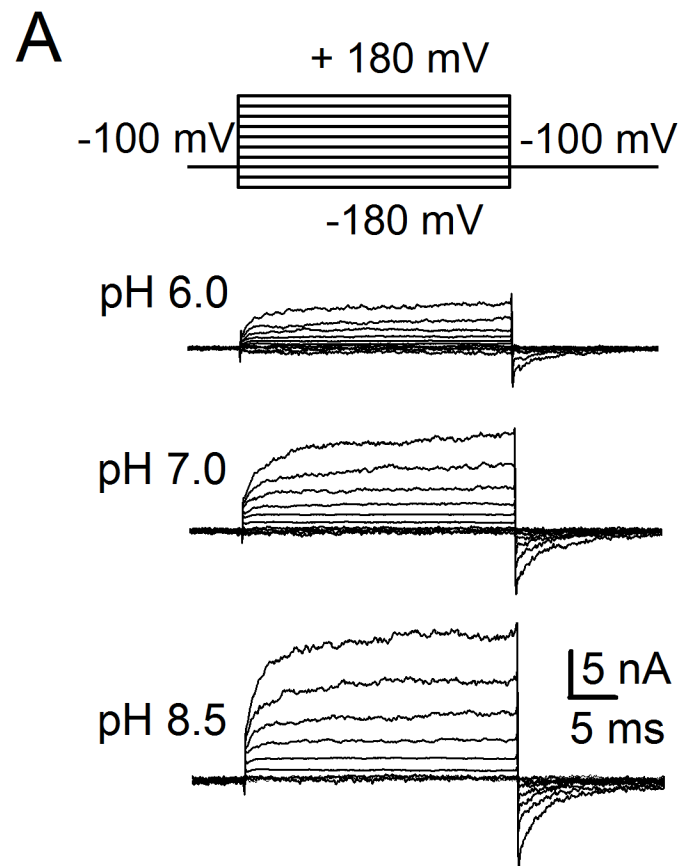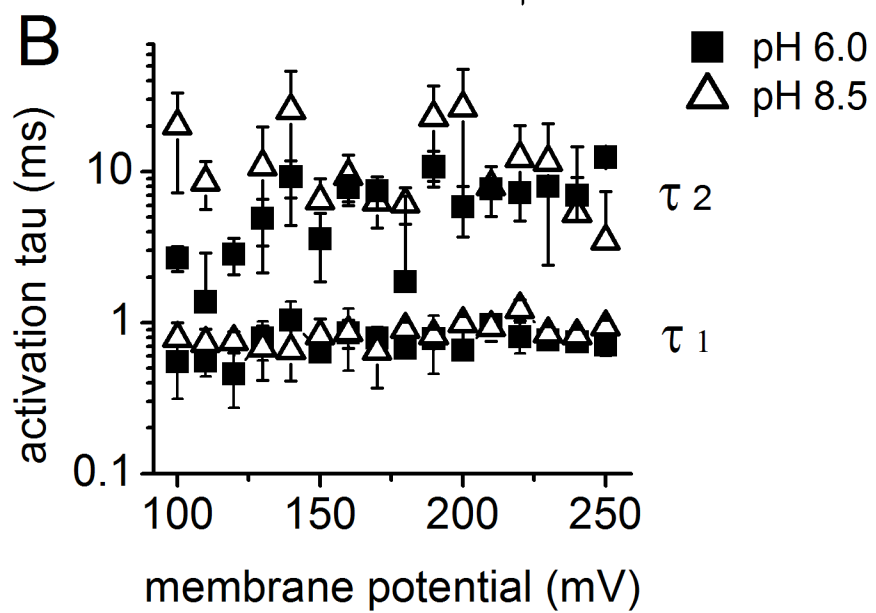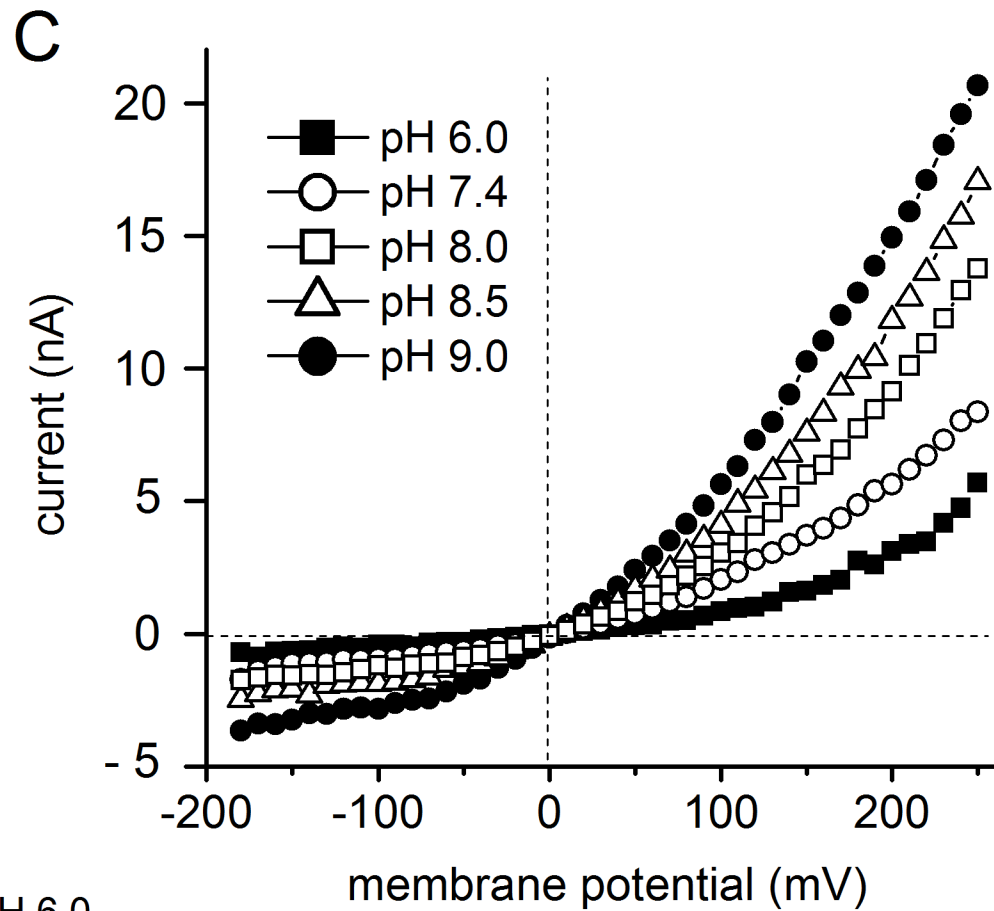

Supplement: jeb066233-sup-jeb063222figs1.pdf [file jeb066233-sup-jeb063222figs1.pdf]
